# Supplementary material for: Understanding the SARS-CoV-2–Human Liver Interactome Using a Comprehensive Analysis of the Individual Virus–Host Interactions
Source: MDPI journal article supplement (doi:10.3390/livers4020016), 2024-04-30
Supplement: s1 [file s1]

Archive with 4 entries (4 files):
- EXCEL FILE S1_Node Degree of figure 1.xlsx
- EXCEL FILE S2_Percentage composition of interaction sources between human proteins and those of SARS-CoV-2.xlsx
- EXCEL FILE S3 Comprehensive Interactions Data in Liver.xlsx
- livers-2892103 - supplementary.pdf
